# Supplementary material for: Comparison of Rapidly Proliferating, Multipotent Aortic Valve-Derived Stromal Cells and Valve Interstitial Cells in the Human Aortic Valve
Source: Stem Cells Int. 2019 Sep 10;2019:7671638. doi: 10.1155/2019/7671638 (PMC6754971; doi:10.1155/2019/7671638)
Supplement: Supplementary Materials — The excel file is the RNA-seq data of all the samples. In order to let the reviewers better understand our global gene expression profile comparison between two types of cells, we provide the original data of the RNA-sequencing. [file 7671638.f1.xls]

gene_id	fpkm_VICP3_1	fpkm_VICP3_2	fpkm_VSTP3_1	fpkm_VSTP3_2
2335	840.09	724.16	8168.06	7843.31
1915	3288.86	3221.77	2884.61	2806.74
1277	650.57	536.79	13571.63	14461.72
1278	992.37	878	8619.4	8736.96
2495	3736.8	3507.93	847.44	865.67
1281	383.66	367.56	3856.89	3737.1
2512	1506.7	1265.29	646.23	637.47
7114	1761.91	1623.77	580.85	593.76
302	1149.94	1119.68	1766.42	1802.22
9168	967.07	799.69	1144.61	1133.67
60	1899.46	1634.95	2081.72	2137.93
5806	167.18	184.11	5.46	5.34
6678	437.26	350.7	3421.99	3480.48
7431	1772.92	1695.55	1686.49	1640.62
6222	667.47	660.25	880.94	890.05
6194	728.45	682.95	886.34	887.57
5054	573.16	555.03	814.91	840.23
6187	517.74	521.58	838.06	863.97
3956	795.22	751.45	1253.47	1235.19
1291	642.77	635.36	537.94	552.71
6171	967.78	945.09	1285.76	1233.71
100462981	969.6	918.09	982.48	1022.09
1634	953.16	900.19	775.76	707.47
6175	625.93	590.9	793.79	763.26
23521	637.17	621.58	684.79	687.92
1292	610.81	583.64	544.94	550.18
1293	227.06	193.61	859.57	799.54
6277	1276.06	1259.47	696.35	730.69
2597	1576.58	1489.68	1308.05	1291.68
151887	978.55	900.86	327.23	357.87
71	963.97	733.17	1150.37	1127.29
6124	412.11	389.12	663.65	623.84
6122	555.9	511.18	693.24	662.96
6202	479.87	459.59	606.78	589.29
7057	321.08	283.09	856.89	886.9
967	1371.05	1480.68	795.16	849.09
1937	628.55	609.2	646.6	640.72
6135	442.71	407.1	488.51	512.87
1938	422.55	396.98	591.73	576.52
6130	473.72	433.2	559.65	569.62
9349	490.06	476.76	536.54	549.47
6223	682.77	631.26	498.27	467.57
6176	724.87	692.55	653.35	615.36
6218	407.34	397.05	553.41	500.45
11167	245.42	223.91	610.22	607.41
3921	401.38	388.15	548.22	542.85
567	1040.57	1006.04	639.96	560.1
6168	591.88	557.54	547.75	487.25
6206	466.6	448.74	455.89	487.27
6129	404.83	387.96	542.61	548.44
6229	283.76	281.96	518.24	532.09
6208	510.91	494.87	565.59	544.96
7076	420.99	441.3	478.15	451.62
6154	403.15	385.46	461.99	454.19
7171	517.63	460.06	707.1	764.94
6189	397.04	362.63	493.28	485.13
6133	420.97	398.28	533.3	478.68
6230	457.51	431.69	489.4	501.8
6125	379.07	357.4	460.8	463.53
6205	570.61	541.75	575.1	570.37
6139	363.17	323.94	421.13	391.19
6144	354.79	337.07	419.98	462.58
6275	2189.13	2244.5	331.93	293.86
6132	399.34	377.53	617.97	585.94
4637	1086.75	1076.24	804.75	843.59
6128	376.34	370.78	443.98	437.23
6160	509.61	529.12	504.16	477.2
6136	454.28	442.51	538.59	524.46
100463486	539.34	502.65	539.53	548.02
6142	268.55	245.46	398.41	362.26
6232	503	465.84	504.57	468.4
10399	418.52	398.29	479.83	468.22
6191	315.47	281.74	338.27	301.64
6159	339.09	323.69	418.1	421.93
7045	47.42	44.6	1696.52	1615.19
6203	361.11	336.15	457.4	425.51
308	470.04	461.08	458.3	464.58
6165	286.47	286.89	378.49	377.13
6188	277.33	262.27	359.27	370.16
857	62.53	68.1	91.96	92.62
9045	261.9	259.72	367.96	380.39
6648	189.65	170.82	13.85	13.52
11224	308.45	293	411.99	384.85
6143	407.18	387.86	466.05	466.84
10398	1322.94	1191.47	459.62	558.25
7070	296.75	332.88	300.52	320.83
5315	1631.13	1729.03	682.17	677.13
6181	298.68	269.27	326.68	317.76
4736	319.34	292.27	400.95	389.55
7169	613.83	569.61	633.36	751.5
2192	309.55	297.11	193.08	188.36
6207	306.8	277.37	394.09	334.68
6152	305.19	296.7	417.24	447.36
2023	1376.95	1327.11	444.85	432.41
6210	256.83	256.22	362.89	340.14
6156	323.32	317.91	328.49	329.02
100463487	346.08	325.14	342.93	347.35
5660	496.3	486.89	204.81	196.31
6155	276.38	271.24	365.49	312.21
10410	706.86	723.2	350.68	394.68
290	9.36	10.33	107.34	112.34
1508	243.81	230.68	102.82	93.24
6217	256.74	231.68	310.08	306.04
3688	831.89	841.72	992.29	984.91
3487	280.11	278.67	44.86	47.55
6164	278.93	273.95	329.15	305.28
6282	735.61	778.01	401.4	444.31
6170	261.89	266.12	336.28	337.86
57124	7.55	6.57	27.95	32.93
6204	305.27	257.02	291.06	273.13
3939	409.62	397.07	374.4	359.82
231	4037.33	4665.13	68.74	69.55
1072	485.85	456.32	502.1	580.19
5176	57.08	55.25	218.01	205.75
6201	210.07	190.88	279.17	259.75
6233	239.66	223.09	290.05	288.19
226	622.16	598.64	286.85	296.2
4257	81.19	80.92	67.9	73.79
4313	439.7	416.75	641.27	621.56
811	485.06	465.8	360.18	371.17
6147	256.66	241.51	280.15	264.64
4267	456.32	472.15	402.2	431.96
871	58.65	51.17	593.86	586.51
5034	457.29	443.49	641.92	655.31
7178	290.09	285.47	319.94	315.88
5216	526.69	506.25	409.58	472.57
1645	884.8	798.82	16.92	16.14
6138	219.41	215.15	218.57	208.8
25873	181.46	196.41	226.47	249.04
1490	1002.47	980.82	532.14	549.17
4869	257.38	251.71	349.68	382.83
6193	193.34	174.94	223.25	214.87
6234	265.81	241.32	228.08	195.26
7077	634.49	610.87	306.22	310.88
4831	320.08	331.62	299.09	283.47
26986	233.91	219.73	246.91	250.09
6224	233.59	236.59	254.58	240.53
5479	275.31	253.64	638.11	649.64
813	281.77	274.2	340.52	346.39
7311	262.8	234.69	235.1	204.18
6235	174.74	164.15	216.15	185.19
1933	214.55	193.32	234.96	232.51
4666	202.16	196.83	239.44	234.71
6209	231.01	227.23	252.22	231.49
4946	365.31	354.41	211.72	209.44
57142	520.68	559.15	225.7	239.68
6281	405.89	409.38	186.5	207.21
1471	223.58	241	174.44	182.06
7316	363.75	354.59	246.3	221.02
2201	1.73	1.71	0.7	0.68
301	815.13	903.62	272.23	259.74
5954	90.37	86.79	158.26	162.67
6134	161.47	150.15	283.73	258.43
284119	281.14	284.35	251.79	269.3
5118	126.03	116.33	419.51	434.85
6141	200.14	191.2	246.12	226.88
2778	477.15	451.48	510.39	473.58
293	188.96	167.49	158.13	155
4311	5.77	5.83	7.43	7.08
3915	105.04	99.43	70.61	68.73
3178	180.46	191.52	296.43	332.07
10627	428.71	391.87	224.14	222.88
10933	237.83	230.4	279.74	272.95
715	223.75	211.95	76.31	77.74
975	427.01	391.77	216.32	218.13
4502	22.69	19.67	95.05	87.87
2316	470.1	380.41	443.78	450.83
826	326.28	341.83	221.57	236.65
387	362.73	343.15	325.19	331.1
83442	371.33	430.58	123.75	144.16
79026	156.13	150.93	153.08	148.45
5478	397.32	378.91	269.7	261.53
347	1.16	1.37	0.43	0.24
1290	113.68	116.03	885.61	873.2
7345	299.66	280.98	136.56	139.44
6161	136.31	125.84	167.2	167.01
4323	128.65	126.98	247.95	239.36
3945	272.7	260.26	197.96	192.89
378	233.27	229.85	272.46	286.78
4811	14.47	12.64	26.29	25.99
3312	382.71	334.96	226.33	218.39
9741	217.62	219.1	198.92	204.3
8406	11.36	10.08	73.53	72.36
4904	205.11	202.15	172.99	193.6
689	167.29	179.96	201.1	199.42
5872	90.8	103.42	85.31	91.73
126393	151.23	148.73	86.35	125.76
8878	230.74	220.56	59.45	56.24
22943	121.08	126.14	5.38	5.58
3315	263.02	241.56	345.16	363.41
26471	386.52	383.07	147.45	153.94
3069	195.76	182.29	255.76	238.55
2950	161.8	155.41	202.8	202.42
10209	181.7	165.82	212.61	226.7
7314	338.29	335.78	266.71	240.88
6231	178.29	175.74	173.15	179.61
2280	238.8	233.19	167.9	173.98
1973	174.24	161.92	242.5	237.46
3491	351.55	349.17	300.99	320.46
6169	136.53	122.44	140.26	152.07
203068	272.48	214.04	316.47	323.12
5250	201.18	191.3	212.04	209.05
7184	287.25	268.61	395.59	401.46
8613	90.97	107.29	20.38	18.5
5052	339.67	331.46	221.95	198.98
100462977	161.3	151.07	161.98	156.3
5757	270.08	275.27	254.85	300.35
123	20.45	19.71	9.14	9.05
1982	207.99	198.2	202.02	203.8
468	216.03	224.42	305.94	322.48
8407	221.63	213.9	278.07	293.17
1984	187.15	188.7	216.4	216.78
23406	47.69	49.08	37.72	40.51
3927	103.23	99.11	97.24	105.51
8754	55.32	53.48	96.06	98.65
716	186.78	174.46	75.67	72.36
2200	170.28	153.84	629.21	605.25
3091	341.11	328.87	182.28	180.72
2876	194.58	199.58	61.98	58.23
6158	137.38	127.73	160.31	150.72
4000	340.34	321.59	239.72	244.54
1622	194.12	190.05	169.09	167.37
10376	268.89	203.62	427.64	460.19
3912	86.88	79.77	101.98	94.58
506	202.32	194.77	162.91	160.37
682	236.8	228.57	141.51	138.59
445	41.53	42.03	27.83	28.7
7167	178.77	177.44	196.33	197.23
1173	241.91	235.26	188.49	190.26
800	675.6	661.94	413.23	428.44
9643	86.83	86.44	163.52	168.79
7531	232.48	232.53	157.88	172.84
10581	133.72	141.6	99.8	117.37
3326	244.37	239.56	257.38	262.41
54407	265.28	269.78	259.87	253.27
11014	119.92	110.47	211.28	216.27
6167	113.76	103.54	130.38	121.92
8839	10.18	8.35	0.42	0.47
514	243.11	232.94	195.9	199.54
10109	201	187.59	187.9	184.63
1975	110.67	110.95	127.22	127.83
6173	68.11	63.73	129.75	132.41
10516	192.67	180.82	334.59	354.91
103910	277.81	275.6	153.56	145.95
3554	80.99	78.42	53.79	50.65
3309	107.5	100.48	195.83	189.05
4240	900.82	894.08	47.86	49.1
6876	1607.15	1289.58	940.41	1017.96
832	127.57	120.54	208.27	207.88
11337	170.56	152.94	172.09	187.46
2879	113.81	110.94	45.92	42.79
2752	107.77	130.38	34.44	32.85
7837	63.19	55.72	209.78	199.67
30846	140.09	132.75	94.7	100.95
7295	120.16	117.88	97.32	94.72
5159	68.87	70.66	103.59	92.61
7009	203.9	207.72	128.3	128.06
2012	53.62	60.38	47.96	42.08
22795	27.96	24.14	27.63	25.99
9415	213.2	197.59	257.3	262.91
5547	75.1	74.52	45.98	47.29
821	168.81	166.64	183.32	192.63
115908	68.53	59.08	435.71	464.53
4035	154.9	147.82	224.69	213.86
1289	52.35	45.78	925.97	940.77
6227	142.52	133.22	154.98	122.89
805	295.22	321.84	315.49	345.18
1350	222.88	205.54	145.74	145.64
498	165.68	161.9	176.15	171.54
3646	85.31	81.73	139.5	125.95
2617	85.39	80.08	202.23	197.57
11034	969.79	947.01	392.28	377.13
4735	167.46	160.25	179.89	180.29
1603	172.73	156.36	164.81	159.77
4837	108.68	104.96	165.22	156.06
1192	171	162.66	149.05	149.88
2197	147.41	147.36	150.42	151.23
3489	50.62	53.38	5.63	6.28
1509	911.21	854.91	521.27	523.74
3159	101.66	131.94	21.43	25.05
2014	308.73	295.76	165.75	164.74
4627	321.78	282.76	262.67	284.9
2180	14.59	12.99	13.91	12.36
25932	301.31	326.79	179.24	181.8
4738	194.36	209.96	130.98	145.04
1303	66.58	59.35	390.89	386.68
1026	247.78	269.06	78.29	84.29
1727	318.13	327.32	108.44	113.11
334	381.13	459.99	68.35	67.86
3106	236.92	223.12	155.27	147.95
133	6.35	7.4	0.61	0.51
2923	155.09	148.06	201.2	201.53
3181	194.21	221.63	212.01	243.91
100128731	212.22	190.89	259.52	256.11
3916	269.5	254.58	127.76	121.94
7791	123.46	117.89	113.94	137.95
824	301.3	315.38	80.17	74.64
351	436.9	450.12	208.01	203.82
3190	157.08	161.54	167.89	171.29
389	142.97	135.24	116.59	127.42
3094	133.01	134.39	126.88	120.96
10493	223.57	205.65	64.77	67.43
58505	112.49	105.79	195.33	202.26
8992	276.32	267.04	72.96	73.17
8721	137.7	132.78	157.21	161.59
10567	170.56	157.66	173.39	171.31
29927	134.89	132.99	200.48	197.05
1327	152.18	142.34	112.6	110.4
60681	87.29	88.22	324.15	319.13
27018	135.74	132.22	117.28	128.12
2289	8.01	8.74	62.86	64.18
10487	189.17	178.96	155.25	164.83
1936	86.76	83.91	130.03	134.11
8099	278	268.98	248.2	244.87
4015	105.35	104.26	103.61	100.18
8933	96.77	94.06	133.47	146.31
10130	199.9	196.07	207.86	210.62
26509	111.98	110.11	60.19	57.66
10971	163.51	165.56	118.71	120.45
57333	87.07	82.24	220.72	232.42
10370	54.16	64.16	45.64	50.03
4478	290.69	266	172.49	191.43
9500	107.08	93.24	213.79	212.28
3490	1324.08	1267.85	532.72	566.02
8655	181.2	168.75	151.2	148.99
6464	89.97	91.76	67.57	67.79
23471	134.35	135.74	175.38	178.63
7812	188.7	185.75	124.47	117.18
3992	61.44	55.72	72.96	72.8
7534	192.32	187.51	147.44	151.72
3105	369.75	375.04	322.31	347.09
9551	140.88	139.1	122.46	126.1
25824	198.6	187.02	140.69	136.68
2202	736.68	677	59.49	63.38
808	109.87	113.69	87.05	100.08
6647	150.11	142.03	106.22	113.99
10945	111.73	108.04	147.43	158.29
4673	160.7	161.34	97.35	95.92
79689	2.18	2.21	0.16	0.1
375	114.81	116.7	138.58	126.83
1728	51.67	49.69	43.63	40.72
5156	130.94	131.7	96.9	87.08
6228	92.93	92.49	101.18	87.94
6695	48.71	48.33	214.37	210.82
3678	95.23	85.18	139.97	138.66
309	122.62	107.12	123.44	121.92
6146	95.42	93.92	88.69	90.31
2771	160.78	154.25	162.27	174.79
4725	82.37	79.03	120.11	122.41
10628	1.15	1.2	15.24	16.41
11315	179.02	170.17	139.68	135.08
3320	177.5	174.69	113.24	111.94
10476	93.2	99.63	78.5	88.14
7086	117.85	109.41	113.37	112.02
4017	85.17	75.97	30.83	33.01
977	458.66	464.17	204.77	207.28
7388	134.18	132.88	107.68	105.49
444	89.18	86.12	80.44	83.89
8682	379.93	372.26	81.27	85.62
476	207.12	212.86	83.89	81.48
4259	147.26	164.14	98.17	95.19
4282	132.84	131.73	115.75	109.3
396	165.41	162.6	130.41	144.71
51386	90.69	84.25	104.67	95.44
5270	1722.38	1770.48	421.93	402.76
9124	66.83	58.78	21.56	21.59
3959	136.49	132.53	28.47	29.75
100532736	71.46	77.07	81.78	85.11
1282	58.86	44.85	137.65	150.35
9948	174.59	163.43	86.56	88.39
706	156.63	152.07	95.99	108.83
1514	71.36	67.71	52.81	49.79
5714	62.77	59.43	52.97	51.8
4779	121.48	128.02	72.9	76.49
6386	106.71	110.39	40.98	41.48
22809	17.3	17.76	24.2	30.62
8644	333.86	345.58	35.78	29.1
6510	20.49	19.64	95.12	98.23
6137	67	63.38	80.92	81.32
10457	246.93	217.84	15.1	12.88
5223	209.22	209.53	116.69	115.28
6319	289.76	255.83	427.43	426.61
7360	61.48	58.9	49.92	51.68
10094	92.29	97.7	113.43	114.5
7458	118.29	125.71	136.82	144.91
8665	72.59	64.56	83.55	79.24
6166	117.8	125.35	130.79	130.51
10097	92.21	90.33	102.6	100.32
1513	345.59	332.44	63.34	59.69
9445	531.34	581.11	191.69	190.63
517	86.75	85.74	100.93	105.01
4691	130.87	138.44	129.08	146.95
51079	161.3	137.77	105.36	93.23
60481	54.22	54.07	53.61	49.13
527	197.22	201.08	86.22	96.37
1265	49.92	47.11	102.07	112.18
1284	126.13	103.86	154.05	163.52
25798	143.38	135.16	47.4	49.82
1476	107.36	99.29	52.8	48.49
338773	10.98	11.55	148.5	157.9
140576	86.12	83.64	96.42	89.93
23770	180.93	183.7	95.84	104.14
4833	132.72	125.84	83.69	89.25
10970	137.45	128.25	230.04	240.6
710	73.7	64.65	12.58	12.06
8663	108.63	104.94	96.09	100.83
10417	36.45	29.48	3.7	4.06
6836	99.41	96.92	140.56	141.42
1211	155.23	144.65	76.15	77.2
9358	192.11	203.88	266.24	275.69
55752	86.34	82.98	251.99	255.48
10589	155.02	173.48	98.85	105.91
6157	60.7	61.86	76.97	83.4
1268	0.37	0.31	0	0
7296	89.4	82.3	33.12	32.62
9403	90.76	92.34	74.31	67.84
57222	137.34	135.81	65.31	65.01
2199	312.81	316.02	14.78	15.05
2665	88.56	84.16	117.32	112.03
5654	122.6	115.81	147.34	134.11
9961	92.98	91.6	55.92	56.95
3020	129.16	127.83	182.47	184.36
6746	99.49	95.49	199.37	200.79
6633	112.75	105.53	85.89	101.02
2782	155.5	152.08	113.67	114.63
51065	77.77	80.79	56.68	50.68
3572	70.39	72.67	34.76	31.4
4134	118.41	117.18	108.52	114.94
2017	132.3	132.69	69.79	65.47
1340	115.66	115.27	78.35	82.11
3716	76.9	80.49	24.31	23.7
64855	154.9	157.11	101.12	102.16
5763	225.81	240.86	235.69	333.06
23193	90.65	91.73	135.98	140.36
2224	146.42	148.64	114.76	109.92
8531	58.2	59.69	26.97	29.66
5376	64.4	57.24	56.98	55.35
5204	118.92	119.13	93.22	88.22
1650	149.65	147.3	153.3	155.52
6727	153.57	145.95	100.35	103.29
7170	91.28	91.33	94.11	99.25
29968	16.53	19.8	115.4	118.95
30851	83.75	83.48	46.57	50.15
10549	126.48	121.58	140.49	135.95
5552	69.47	78.16	85.06	83.24
10577	387.88	375.5	58.13	53.49
311	86.54	84.66	38.43	39.65
9554	60.88	60.94	62.87	60.84
81567	161.03	154.09	191.49	181.38
47	130.32	123.84	87.88	87.2
51372	96.63	96.59	86.11	96.62
7474	0.69	0.9	43.8	41.14
5441	109.83	111.15	66.39	71.74
87	380.25	363.24	169.15	170.19
440400	233.07	243.42	83.18	80.74
1382	2.72	2.49	9.56	11.49
10959	120.56	119.27	151.86	152.95
3068	156.24	156.3	100.35	119.25
3958	35.01	33.67	27.55	26.22
10857	151.49	169.2	88.38	82.64
27286	59.56	58.06	41.05	39.53
6301	60.19	62.07	91.97	93.4
7168	297.7	266.68	407.11	448.29
10092	117	111.67	74.02	75.55
8763	119.87	123.35	94.76	93.73
3183	110.71	121.37	112.46	117.73
22872	78.92	72	105.77	99.68
10956	114.94	116.34	113.97	119.25
1974	212.75	217.61	86.98	83.84
3910	50.41	49.83	6.24	5.92
7979	81.09	73.63	99.73	111.23
11098	210.23	191.2	206.57	215.49
59286	144.74	129.51	98.26	85.77
51186	79.58	92.73	103.63	125.45
2621	107.8	87.57	145.12	142.96
10797	27.3	27.79	104.74	107.54
166	165.26	172.17	69.56	79.84
9509	18.08	16.21	33.71	34.01
54732	137.69	128.83	135.21	130.58
6237	70.53	64.32	39.73	40.55
4942	66.53	64.73	87.62	83.59
1655	142.08	148.3	101.07	99.76
1329	77.87	76.11	68.27	61.7
8894	59.05	66.87	73.39	80.21
6576	54.29	51.62	29.83	32.41
5066	208.28	218.33	26.32	25.64
2896	177.84	174.26	57.25	61.54
3107	413.69	432.84	212.1	217.44
746	78.41	78.35	116.67	125.43
6184	108.03	100.08	129.68	125.69
7879	164.61	169.77	65.91	69.61
93621	117.52	122.17	117.61	117.28
22820	70.06	63.41	98.03	92.7
6772	99.59	91.29	39.8	38.81
6747	56.68	55.6	79.5	78.6
6303	228.14	236.97	52.67	52.1
10226	49.55	48.19	45.75	45.17
79901	194.87	193.69	76.07	72.63
5351	126.79	119.59	161.47	156.14
1981	118.43	113.22	98.74	98.52
998	81.06	82.74	91.58	92.14
6923	67.32	68.41	57.55	58.08
3133	103.13	103.1	37.45	36.38
22949	46.02	44.4	17.32	19.56
57214	303.45	273.69	103.92	105.66
8667	70.94	67.82	71.7	73.43
9510	67.65	77.09	9.78	10.4
9588	60.1	57.08	98.18	95.52
4921	75.1	75.45	59.69	56.58
1902	19.81	18.93	26.2	26.44
5094	105.11	103.68	105.33	100.67
81502	116.58	119	116.48	116.21
9689	126.39	130.49	84.92	80.5
54587	98.12	96.17	102.2	107.67
58485	111.34	110.74	94.25	103.27
10169	119.32	109.36	88.7	92.74
1337	171.01	166	113.85	107.88
2632	53.06	49.36	13.28	12.41
10159	111.4	111.7	85.57	84.19
7416	98.42	89.42	89.55	84.81
7317	79.65	76.36	69.82	69.37
10484	79.54	76.4	107.04	96.73
439921	150.59	144.53	134.95	137.32
1351	122.01	124.04	119.52	115.81
63924	1.95	2.56	1.5	1.3
1675	1.24	0.95	0.1	0.24
831	83.05	80.07	43.81	45.25
5879	103.83	94.85	77.45	80.3
7132	40.75	39.4	60.56	60.14
9276	81.2	76.39	103.21	96.69
6741	64.15	71.24	45.21	53.37
5605	65.13	59.48	44.25	46.14
8079	144.14	145.7	98.08	108.38
11217	123.04	131.9	21.41	22.35
2745	25.19	28.29	16.26	14.82
6185	103.86	97.01	142.02	134.34
7922	77.92	80.58	138.26	142.65
1213	128.77	124.7	91.68	84.67
1175	82.65	75.89	58.45	60.13
7058	252.19	212.87	331.24	326
90993	12.08	11.93	64.51	74.04
6748	135.34	132.82	128.72	129.24
3842	63.61	65.34	31.01	30.08
7094	90.16	83.96	76.44	75.98
27044	88.15	81.19	80.42	79.3
5589	89.97	94.55	98.04	101.55
6396	66.01	62.54	112.28	115.75
316	19.07	21.55	0.3	0.28
6613	155.82	158.06	106.9	100.35
2590	84.78	84.34	57.77	56.13
9902	158.07	164.91	172	172.47
7048	28.86	30.42	30.64	29.04
11328	100.31	106.24	102.72	105.74
7414	83.11	76.11	63.89	64.67
5878	103.87	108.33	55.58	55.98
11260	40.2	37.84	69.47	68.52
7529	78.84	76.77	66.23	64.99
29995	41.06	35.42	101.85	96.31
5230	105.85	101.39	73.76	72.6
4060	312.75	308.34	766.62	719.12
51258	88.23	87.62	98.81	98.44
1435	117.49	132.62	8.11	8.63
3998	41.47	42.37	99.58	95.59
9697	47.96	47.85	61.44	64.58
3376	48.16	45.98	74.89	70.78
4061	133.02	140.51	64.97	68.73
8614	31.79	32.58	42.08	43.62
3030	55.31	55.45	47.47	46.28
23478	77.66	79.5	87.02	88.97
5861	70.86	66.71	83.97	82.14
6050	144.35	136.96	89.3	94
4924	135.39	135.24	111.95	119.94
2547	129.09	128.92	90.33	90.19
23433	72.51	65.83	26.8	25.37
53827	131.44	145.35	72.89	79.65
8661	84.79	86.33	62.07	64.98
2539	89.81	89.24	64.91	64.05
7846	70.52	50.11	148.49	158.68
22836	14.82	14.69	20.95	18.67
50854	140.38	143.06	75.87	76.11
5768	154.96	163.1	59.48	64.74
11015	48.72	41.74	139.89	137.43
2907	122.13	118.26	45.39	50.75
51142	93.28	93.34	94.22	90.21
9589	63.85	64.81	25.57	25.05
5908	64.59	63.83	57.91	54.36
10574	97.73	94.26	70.82	75.49
5573	133.14	142.22	77.34	80.7
8668	70.26	64.79	55.88	52.8
128	85.34	84.98	45.68	44.93
7335	45.27	48.2	57.61	59.18
81	175.94	167.27	116.28	117.91
1314	56.29	52.42	91.84	86.57
51614	114.31	114.19	107.72	100.89
11140	106.42	107.93	67.33	72.36
29997	52.96	50.92	49.67	51.91
10952	78.88	70.95	123.87	117.13
22800	120.37	120.01	11.79	11.09
2109	17.43	19.17	28.7	30.12
5887	56.61	57.02	46.1	49.38
493	55.89	52.73	16.88	16.33
1075	14.96	14.5	33.39	30.19
10550	135.56	142.56	53.93	51.43
79921	47.04	54.71	36	40.7
3988	36.99	34.47	31.3	29.32
84833	102.63	110.73	75.62	65.46
9167	50.36	51.96	54.56	57.11
10099	151.12	154.58	76.56	75.92
6500	110.48	117.14	69.6	69.6
5692	108.93	108.02	77.86	72.4
9528	172.91	178.76	105.81	95.64
4121	46.32	46.73	23.15	21.19
79001	131.01	123.99	102.52	110.5
7453	55.19	59.76	54.31	52.45
57515	156.02	168.32	70.96	69.85
51150	126.25	131.22	79.66	89.14
5352	112.79	116.41	143.86	139.44
989	146.08	152.01	77.03	79.76
55845	83.72	81.76	59.61	61.97
6415	88.9	88.76	53.72	57.03
4493	0.85	1.47	36.45	34.64
10134	131.46	134.55	64.42	67.6
5093	140.04	133.73	105.62	104.33
4055	94.29	86.03	39.88	42.35
1522	141.22	139.6	172.18	161.16
23480	67.71	59.86	117.81	110.24
581	117.97	125.94	52.12	55.98
3417	50.5	50.75	53.81	53.53
754	122.27	118.63	98.75	93.67
6196	35.98	35.05	34.63	35.42
9260	91.16	79.58	125.49	137.61
539	65.97	59.54	75.88	71.26
9141	41.9	44.29	37.69	40.04
26227	17.52	17.19	88.86	86.71
9296	106.97	110.45	56.1	56.87
6726	77.5	84.04	96.33	92.42
29058	65.58	67.47	70.47	66.94
10801	38.4	37.03	42.28	40.88
79002	85	92.26	72.82	78.87
6238	71.29	71.9	143.68	148.27
2783	90.37	89.71	71.2	71.21
1528	50.78	55.99	12.93	14.98
84790	74.99	55.75	87.28	92.97
2222	145.14	134.55	84.67	80.59
4708	83.82	71.44	58.99	55.78
1601	63.71	63.2	29.68	32.73
55379	38.86	35.32	87.61	89.15
10174	97.12	110.37	58.9	69.1
8724	101.75	94.85	66.32	69.92
5695	74.42	73.36	57.85	56.12
5689	69.1	64.06	80.72	74.36
51637	66.4	60.77	66.6	62.61
3693	199.57	196.22	173.83	163.22
10095	130.08	136.89	69.74	69.17
6888	66.3	54.77	86.06	73.77
372	77.68	73.6	88.3	86.39
37	63.96	67.79	69.02	64.95
8666	66.55	64.05	61.67	63.14
79144	45.46	39.52	81.34	86.33
25939	22.13	21.41	8.36	8.61
6472	42.42	44.54	83.8	82.24
8560	99.28	96.45	65.27	62.29
1266	241.73	228.84	197.55	194.39
966	200.36	214.06	74.07	72.17
2058	45.65	45.17	69.82	67.49
23451	78.57	82.48	83.51	78.96
6307	190.15	194.18	78.04	77.51
9180	60.36	60.43	29.68	27.45
5901	82.67	78.64	89.55	86.38
23646	130.97	126.4	91.91	92.68
23022	137.93	131.62	146.72	151.28
23741	78.26	81.9	104.03	103.73
292	83.59	75.21	74.03	67.7
2034	177.33	161.63	2.63	3.09
900	61.21	58.1	29.6	27.22
55573	53.98	50.29	50.83	50.08
10313	91.87	91.44	49.38	50.51
5464	98.47	99.95	52.91	52.1
26020	163.89	171.84	64.54	67.12
7415	81.16	79.52	75.29	72.9
5688	71.51	70.11	76.71	70.7
8565	28.21	27.16	70.18	73.3
10983	75.78	69.08	75.97	72.54
2108	44.47	45.28	42.32	40.56
3191	67.05	66.3	79.79	83.43
5693	89.87	91.08	75.26	73.68
7203	64.38	62.47	66.77	67.35
5687	66.68	65.88	57.12	60.01
4076	89.74	89.56	66.28	66.83
2969	95.92	95.89	67.71	63.59
4694	91.57	94.76	65.21	61.07
51148	81.58	79.66	139.67	142.98
25996	107.16	111.47	62.28	60.68
1295	66.52	67.77	324.44	325.69
55076	36.75	32.77	57.82	58.05
960	213.1	219.81	73.5	74.76
3685	60.37	55.64	74.27	72.66
6935	28.5	29.06	28.29	28.08
1495	150.17	152.42	83.69	78.67
57863	12	12.02	66.75	71.03
10920	36.23	36.68	24.05	24.22
1452	59.64	62.48	49.19	49.22
2318	29.96	32.68	12.11	12.11
10133	102.75	102.72	23.93	26.34
8611	180.62	165.27	29.6	27.33
27069	80.46	85.69	51.98	52.63
51313	24.48	22.16	19.34	19.21
1654	108.11	110.42	50.92	47.12
1315	63.02	61.59	72.59	68.1
509	64.61	66.82	71.11	73.89
5685	56.14	53.36	64.46	65.88
23446	52.47	53.76	48.72	44.2
6612	73.99	73.81	51.49	55.77
56005	112.84	114.15	103.34	98.16
5217	52.86	51.23	72.39	73.88
10211	38.82	35.97	59.03	61.97
5720	74.08	71.02	33.67	33.27
10106	25.67	25.62	48.01	48.57
3015	90.39	90.64	128.32	121.84
3329	67.88	64.18	67.98	68.66
829	59.31	66.31	45.42	45.5
9537	5.54	5.01	8.1	9.57
83658	156.78	167.35	65.14	66.04
84617	98.49	86.88	78.97	80.41
23787	127.24	118.03	63.19	63.14
64114	133.49	133.1	53.47	52.98
5226	75.45	71.15	67.07	66.02
8683	60.37	60.13	61.15	64.54
22936	20.83	21.49	31.41	32.74
23603	88.21	83.29	58.28	56.81
3703	81.17	78.22	106.56	105.45
11171	65.21	63.19	65.12	69.17
5339	61.29	63.3	80.33	82.09
6430	60.59	61.73	59.42	59.93
5682	74.3	75.58	59.53	57.88
4726	63.1	56.8	55.08	56.47
51449	67.01	66.34	27.42	27.16
10935	91.92	90.78	49.54	48.56
51474	160.29	157.45	78.75	78.8
4677	76.08	76.85	64.07	63.78
220	2.89	2.37	0.28	0.28
6624	60.18	53.15	71.57	74.54
1535	75.75	76.43	35.85	40.35
10541	40.1	40.27	56.52	66.44
28959	2.65	2.73	0.1	0.05
55970	69.01	70.06	58.81	60.4
5708	97.69	94.52	62.9	64.59
5476	117.06	117.22	43.86	44.33
7384	49.32	45.48	51.15	49.2
22818	38.22	37.7	54.4	56.83
7417	79.72	76.34	59.45	54
8664	48.41	44.45	41.51	40.65
4641	112.62	104.37	76.32	74.9
3187	67.91	82.31	92.39	92.9
1176	56.8	59.84	46.06	45.92
55754	74.16	76.22	48.67	46.57
5935	28.81	27.5	43.79	50.03
81876	96.47	104.38	66.02	66.47
58472	19.6	17.62	1.73	2.94
9448	74.84	78.1	51.66	51.37
1174	44.59	48.07	41.49	42.28
214	40.59	39.86	28.24	28.95
55505	73.59	64.64	57.14	58.95
8815	84.45	83.2	69.97	79.35
4170	54.25	54.31	71.68	70.94
2022	302.82	324.73	35.09	36.52
4841	85.4	85.29	83.71	85.52
55062	21.41	20.49	42.34	42.03
3913	116.41	119.09	69.81	69.78
8434	60.04	62.75	25.27	24.74
9394	8.41	9.45	7.98	8.06
10972	99.85	102.24	96.87	99.93
200185	46.66	46.71	60.27	65.94
950	124.77	115.89	49.45	48.78
718	61.58	56.92	0.9	1.03
6902	72.52	78.78	45.73	53.31
4144	53.41	54.71	59.01	63.08
6284	65.61	72.74	63.09	61.48
3428	57.87	58.67	31.2	26.97
2273	288.92	275.52	77.34	79.34
25840	19.49	21.09	25.3	24.09
25912	110.52	108.46	65.48	64.31
1349	90.43	79.17	61.14	53.1
160428	7.58	6.97	59.76	61.87
6897	40.95	42.49	62.56	60.81
135228	11.27	10.58	26.92	24.59
10916	89.98	76.65	112.54	104.86
9246	54.29	55.58	18.51	17.6
5705	72.78	75.32	60.04	58.7
5010	22.35	27.46	0.45	0.23
483	236.46	240.68	53.86	47.53
10955	77.16	79.6	46.28	47.01
2098	69.64	64.26	56.05	52.41
57190	36.76	35.61	29.56	31.41
7001	109.9	102.57	59.27	53.9
3837	68.6	66.49	65.77	65.45
3313	77.15	78.24	51.73	53.71
160	64.41	63.78	32.05	31.53
140606	83.61	73.82	56.91	48.62
2040	40.24	39.7	6.89	6.76
11331	47.06	40.86	60.76	57.11
2934	227.06	225.91	89.72	84.37
2059	47.13	50.07	29.32	27.65
595	259.38	282.2	59.11	62.41
3150	77.72	76.62	104.71	110.19
2079	66.82	68.55	64.33	69.65
64859	6.85	7.18	8.18	8.87
7520	70.24	66.87	59.96	58.23
30008	169.52	166.39	81.07	78.9
10787	91.01	86.84	50.64	47.77
57104	37.35	42.78	17.36	17.88
9446	78.36	69.48	34.39	35.31
8829	55.85	59.47	25.9	24.26
10521	60.16	62.41	78.1	76.32
4016	131.3	123.3	110.48	107.28
56889	78.61	79.77	68.19	67.99
64951	90.99	79.3	34.55	32.66
328	69.46	67.93	69.75	76.58
1968	25.82	25.06	38.04	36.47
79709	35.61	32.6	56.19	52.19
10491	67.12	65.4	39.37	41.16
1718	140.58	145.09	88.77	87.61
51024	64.29	66.37	58.08	58.53
3295	41.16	43.4	36.87	33.51
6713	86.81	79.45	79.32	80.23
10342	84.72	76.59	85.41	81.04
51226	58.42	56.79	85.16	83.32
3032	48.88	45.77	35.41	32.02
3340	28.51	29.49	60.96	61.29
3615	37.91	35.23	45.13	45.59
4131	79.59	72.49	42.26	40.25
51522	123.56	125.06	64.01	59.73
7323	77.1	77.55	56.43	54.72
5037	171.43	170.38	71.7	68.18
1499	83.32	84.55	177.95	161.36
767558	106.75	101.76	56.89	57.9
90411	64.82	68.15	34.17	34.22
51232	170.83	180.39	31.78	33.41
381	50.05	49.31	59.75	64.87
4716	61.57	57.75	36.78	39.6
10480	51.54	47.05	50.44	48.33
223	20.76	17.92	39.91	40.81
3611	122.29	114.64	70.99	69.81
3074	113.88	108.27	36.62	35.8
7494	38.13	35.69	85.36	87.37
10768	46.34	48.47	34.58	32.6
7165	53.97	51.93	42.75	39.39
9802	61.02	59.66	45.29	46.31
5834	41.05	42.01	30.06	30.13
353	37.93	36.24	34.59	32.11
493869	32.41	35.75	54.61	51.63
48	26.27	24.6	17.67	16.78
2274	39.56	34.63	24.49	25.15
6591	14.1	14.9	50.35	44.08
10961	104.04	109.82	73.73	73.9
8761	38.78	36.86	33.07	35.08
2130	74.35	80.45	62.62	65.62
649	24.61	25.05	41.41	41.38
8073	50.96	51	40.46	41.01
55700	57.53	63.19	50.43	59.43
4245	48.4	51.46	44.41	43.66
2987	107.9	97.92	54.55	54.11
7284	66.11	69.36	54.99	53.37
6418	79.88	80.13	67.31	67.62
54458	54	67.59	34.01	43.19
11067	31.66	30.99	0.29	0.47
9123	17.76	15.76	42.65	44.77
2697	71.49	73.8	172.07	165.11
1642	51.4	48.41	56.93	55.93
373156	39.29	32.42	37.51	35.82
11080	32.46	32.2	20.9	21.78
83982	72.27	77.42	72.76	79.46
3692	51.8	49.2	49.2	43.81
11335	54.47	53.08	53.13	54.44
6742	50.56	44.72	55.09	57.33
23568	65.22	60.2	58.85	59.69
8301	88.98	82.42	85.9	82.1
1639	93.76	91.53	42.21	43.52
5829	50.98	56.51	29.69	30.54
91663	50.72	47.88	62.63	73.27
122953	14.85	16.07	28.66	30.5
521	73.12	65.74	65.48	78.76
54543	65.35	68.93	40.39	42.87
2521	126.1	139.97	117.83	122.9
10423	60.58	62.78	39.44	41.2
1345	57.06	56.18	41.43	40.93
81688	61.76	55.94	69.9	71.11
6993	45.43	48	47.34	47.32
65108	18.65	17.73	20.66	25.2
1778	70.99	68.8	46.09	42.57
4897	0.48	0.37	0.46	0.5
6717	54.28	47.65	32.16	33.7
51119	109.63	109.48	44.95	48.99
126328	45.23	39.42	41.18	39.18
55858	45.4	45.37	59.93	59.58
23423	93.1	91.02	64	60.35
10728	80.62	81.71	61.65	60.98
8826	77.67	72.5	72.41	69.27
6711	167.81	176.78	46.72	46.46
2683	56.55	56.47	60.16	62.72
10409	94.45	98.38	84.87	101.17
3162	29.32	31.48	7.51	6.49
5033	48.21	47.71	72.72	67.64
3638	58.34	51.56	75.46	73.69
91624	40.76	37.02	27.42	30.35
56944	87.21	80.93	292.07	294.02
64834	76.5	79.61	61.73	62.53
5018	43.6	42.52	36.11	36.24
5518	66	68.33	41.44	41.84
16	31.49	32.1	55.9	55.08
11100	84.1	90.56	64.06	71.76
221749	44.05	36.97	26.29	26.54
4784	113.75	120.26	90.34	100.38
6649	81.29	80.53	1.44	1.9
5859	39.61	38.94	54.42	50.98
6347	721.58	802.73	19.96	18.4
3339	98.31	94.97	60.61	60.47
516	45.38	40.5	43.48	46.2
10979	67.7	60.12	83.47	81.73
4179	67.96	72.92	36.1	36.43
5721	66.83	66.4	40.91	38.77
51246	94.71	97.56	42.76	44.79
26472	119.3	114.87	87.12	90.44
5641	62.78	58.5	18.89	18.53
1465	151.69	126.85	116.44	130.41
10175	79.33	81.85	55.65	58.06
7532	76.47	73.1	49.47	51.3
387882	43.94	35.72	18.89	18.39
22885	8.72	8.61	8.98	7.92
10670	54.77	50.75	57.63	55.01
801	79.99	73.72	62.11	61.71
1595	98.02	98.08	59.34	57.76
51035	52.05	55.95	41.88	49.3
118	88.87	89.51	45.46	46.38
529	110.45	107.74	32.63	30.4
55365	2.98	2.33	0	0
9060	60.32	58.77	52	47.27
822	40.01	38.3	55.56	54.02
64778	39.9	42.05	51.91	48.38
2746	40.48	41.84	38.8	37.32
5725	50.45	48.77	55.39	53.37
388610	13.6	13.76	9.58	10.46
4715	64.25	58.47	44.43	42.99
1347	75.27	67.32	63.87	56.94
56681	67.52	70.89	56.13	57.06
10897	33.19	29.61	75.15	76.09
51669	131.26	135.51	105.23	105.38
6767	64.05	62.74	38.47	40.65
201595	60.64	59.27	64.07	62.04
4141	37.01	36.23	64.82	61.06
54985	183.55	211.5	91.69	109.72
7332	58.98	58.69	42.37	46.53
92689	72.6	73.36	67.14	64.51
3157	73.17	68.62	78.44	79.6
55002	47.81	48.93	37.73	36.24
1646	170.65	168.04	4.05	3.87
58533	37.5	37.29	25.76	24.1
2152	0.43	0.58	22.62	21.03
10383	90.07	73.76	60.68	63.52
27243	69.63	64.9	43.93	42.01
5355	111.29	104.12	159.24	178.3
5862	32.78	31.7	38.17	37.59
27335	50.05	38.06	43.15	41.26
7123	1.84	1.48	0.44	0.62
3920	65	65.74	34.93	34.44
5236	55.15	49.82	37.98	34.72
401505	34.91	33.15	38.96	38.02
347735	13.69	11.05	6.98	8.1
10412	34.56	34.06	37.9	42.56
1627	38.53	40.84	73.08	81.1
59	1256.64	872.22	955.51	939.99
10216	1.29	0.97	15.51	16.25
10093	62.88	62.92	50.67	50.33
2191	47.96	48.85	102.86	93.56
10791	60.65	64.36	20.99	20.17
4830	63.26	57.55	70.22	71.37
3732	7.4	8.96	9.21	8.43
50865	38.44	35.73	16.3	13.21
5396	173.77	181.66	88.68	84.61
90488	26.52	27.23	59.6	61.03
6455	34.96	34.06	44.19	46.46
4670	42.16	43.06	60.85	63.39
9377	52.77	49.9	37.64	39.94
11316	64.09	61.81	55.96	51.79
488	56.8	55.96	30.73	30.14
6950	61.9	58.99	55.09	53.09
10618	68.86	69.95	38.91	38.2
6625	67.15	75.54	54.66	57.72
120	56.68	63.81	32.62	30.06
3151	29.03	27.11	91.11	97.08
147495	6.96	7.07	1.33	1.97
10096	45.87	42.8	46.73	47.48
23585	64.61	65.26	41.34	40.52
56851	104.45	102.03	62.43	60.62
27242	3.81	3.44	7.86	7.77
51506	76.56	74.79	51.57	53.31
7341	54.59	58.95	55.54	60.17
10492	57.79	62.97	61.91	64.48
22985	54.54	58.43	55.68	56.3
93974	80.03	74.05	58.18	57.45
51371	50.31	47.17	36.93	32.03
6414	31.46	35.82	0.4	0.49
6421	58.1	65.42	56.31	65.91
4714	68.69	69.81	49.91	45.64
598	74.96	85.01	25.47	27.13
1312	71.1	73.09	50.34	44.96
10608	28.55	31	46.24	46.8
10552	38.52	34.41	25.97	24.94
9871	37.19	36.12	67.44	65.6
10447	114.01	122.1	45.69	44.57
10992	68.45	68.74	56.87	57.53
5700	57.46	55.95	44.44	48.48
29101	63.24	60.04	55.17	53.18
23385	54.19	54.16	33.22	33.82
80097	61.28	60.35	51.93	51.02
25844	64.17	66.34	78.93	84.16
1912	20.72	19.73	22.25	21.61
377	56.75	59.29	45.16	49.18
51144	83.01	81.78	30.31	29.28
1978	17.57	14.73	81.04	82.66
8775	96.55	91.3	36.04	36.24
4729	53.72	53.96	40.73	36.82
29959	43.3	38.88	62.84	62.87
389136	19.11	19.98	7.02	7.51
3301	83.69	88.19	43.86	45.83
2799	123.21	120.42	37.26	37.88
8974	19.31	16.74	116.17	110.05
283820	190.67	195.24	112.56	99.71
3949	55.72	53.05	37.89	37.18
122786	96.38	97.73	50.14	49.67
55256	85.86	83.36	39.38	36.8
51187	32.51	33.5	55.93	57.11
4713	55.23	53.66	43.15	45.21
3182	53.54	51.85	62.37	61.52
4128	7.85	7.9	7.1	6.98
27020	129	133.42	53.77	54.48
57136	59.85	61.21	38.08	38.47
677	44.33	49.46	35.91	40.25
440	5.64	6.96	70.26	65.35
2995	22.34	22	5.36	5.29
5781	62.95	65.24	28.65	26
4052	38.5	35.25	122.31	117.7
3185	55.25	55.55	42.6	41.72
10694	76.73	74.16	54.99	58.55
9805	62.95	65.3	18.22	18.22
2132	52.84	48.26	51.9	47.98
81029	6.52	6.45	23.62	23.76
10049	59.57	60.94	48.81	47.6
10544	23.02	23.1	14.1	15.05
100463482	34.12	30.05	36.54	30.79
5870	60.24	62.26	53.08	50.4
10980	58.55	55.91	44.77	42.52
708	55.16	56.25	46.34	48.22
219654	57.98	61.68	20.28	22.09
2091	38.49	38.65	52.15	52.48
5742	9.38	10.48	44.92	44.47
5980	9.31	9.71	6.03	5.8
8409	43.17	41.42	32.13	30.69
29956	139.38	135.44	44.09	44.17
833	18.93	18.49	32.96	32.1
817	73.55	70.25	18.77	18.95
9341	80.97	80.91	40.02	39.49
196463	72.1	70.72	34.23	38.49
9130	60.54	54.68	43.14	45.41
4358	56.86	51.55	26.83	27.05
51303	19.53	17.23	82.85	83.82
823	58.85	56.23	31.17	31.79
847	12.97	12.21	25.16	22.61
9538	40.08	37.72	32.76	34.43
7328	67.89	70.48	28.22	28.03
79188	62.54	62.33	42.03	42.25
908	41	41.41	50.08	45.14
6342	74.84	76.09	37.75	36.21
3908	16.24	14.99	54.86	51.61
10575	44.85	43.12	43.37	44.39
1212	233.11	255.55	23.48	29.11
8840	11.32	11	49.21	48.57
9601	41.84	40.76	75.56	78.28
207	67.57	63.59	52.88	54.73
10540	64.62	63.1	43.52	41.5
152503	29.08	30.31	22.38	21.95
28972	55.72	59.86	59.43	54.6
5360	51.23	47	19.64	20.18
2744	184.07	193.28	123.2	123.45
65264	52.26	54.42	34.76	36.93
26010	59.74	61.31	82.68	80.7
7329	43.85	49.16	48.23	44.41
51374	87.04	80.42	50.71	47.11
118429	20.73	25.16	7.82	6.65
3613	2.83	2.39	3.77	4.14
85456	30.59	30.45	32.27	36.3
3995	64.26	68.26	19.33	22.79
51727	68.33	64.59	58.29	56.58
5245	41.7	45.41	35.54	37.34
4707	51.78	56.11	41.61	38.12
23516	34.39	35.08	58.53	54.52
9556	38.42	31.12	39.4	33.28
54867	42.12	40.15	52.42	54.62
9375	55.6	55.67	73.63	66.99
5499	35.58	33.84	44.14	46.79
23524	55.28	64.48	55.05	54.39
81631	91.44	95.1	34.7	32.77
858	19.68	22.31	16	16.18
9784	74.75	73.31	44.19	42.41
2790	44.27	44.68	37.41	38.85
55969	40.8	40.7	29.34	32.17
475	72.86	61.92	37.13	36.77
80381	57.14	51.58	41.92	42.24
8031	67.24	68.05	35.82	35.31
10899	44.88	42.16	44.6	39.44
2687	30.9	27.35	16.7	20.07
114897	136.01	136.52	2.11	1.59
27166	62.6	57.59	43.29	42.12
6709	70.82	67.74	52.93	53.14
25999	26.33	26.93	21.99	22.63
8662	44.66	45.6	37.23	37.43
2739	54.48	53.61	42.84	41.79
4642	65.47	57.12	46.16	42.9
23187	70.12	75.53	33.38	36.73
64175	38.43	31.66	103.2	97.94
54541	7.29	12.11	149.3	156.77
4616	43.05	47.74	56.65	57.87
9420	1.3	1.32	0.35	0.68
7536	64.42	67.15	55.19	61.43
4191	44.99	45.59	34.48	34.15
4047	114.87	110.38	58.56	60.26
10490	40.45	39.92	35.51	31.8
3021	52.64	50.9	58.1	54.59
23420	94.81	92.6	53.45	54.45
51329	48.21	49.32	43.7	52.28
5694	58.75	54.96	51.71	48.67
10346	41.82	44.93	15	14.01
4898	43.84	39.24	37.32	35.06
6917	45.58	47.92	44.72	44.19
10652	59.1	59.04	59.84	53.96
64083	35.37	35.17	35.7	33.52
54206	19.61	20.77	8.21	8.29
3843	54.58	52.63	30	28.53
7555	44.76	45.28	44.13	45.3
5110	56.91	57.48	47.55	44.21
23558	91.36	97.1	25.26	24.92
25994	42.34	46.35	24.79	22.54
1153	37.37	39.94	63.19	63.49
6389	51.88	50.64	44.32	42.45
6774	55.28	55.76	35.46	36.02
9114	56.24	50.14	27.96	29.21
28974	45.81	41.2	40.66	40.3
64853	59.82	58.27	41.69	38.95
125	10	12.18	0.16	0.21
6392	42.72	43.15	35.49	33.88
307	38.54	39.09	20.68	22.23
7267	47.02	41.98	88.98	87.45
10449	19.81	19.93	21.4	20.99
64960	32.15	31.6	31.73	31.99
5684	42.61	37.6	34.84	31.47
3735	42.91	39.26	39.44	37.14
4710	57.19	58.14	43.37	39.81
51596	77.4	77.45	48.74	54.85
6723	52.87	51.34	46.51	44.85
29924	75.1	76.35	41.17	47.69
10055	50.81	45.51	50.58	49.27
170622	32.55	27.8	38.7	31.21
3192	52.91	56.89	50.37	52.77
5702	43.31	44.99	53.81	54.03
2170	15.4	12.92	1.74	1.66
7205	78.11	81	36.9	36.27
5501	49.07	51.63	39.21	36.71
5710	47.07	46.85	41.94	43.93
5468	2.38	1.9	0.16	0.04
10755	65.86	66.69	31.22	35.44
2029	57.97	60.75	52.29	54.52
90843	46.46	50.13	49.19	50.68
10272	51.3	50.27	51.49	60.27
665	43.08	47.16	30.4	32.08
4853	37.01	36.49	28.31	28.22
6778	50.07	54.3	17.2	17.03
1803	42.82	42.02	0.57	0.55
10726	61.69	56.99	46.36	44.78
4643	24.96	23.41	11.8	10.94
6520	27.68	33.29	51.67	53.27
11231	43.67	43.68	50.14	49.81
100463488	29.34	25.26	27.9	25.54
80700	49.89	49.35	41.93	43.04
9898	54.87	54.27	41.37	42.68
9584	53.82	57.58	49.68	49.09
1431	51.58	48.8	39.14	38.89
84335	51.38	53.74	29.09	36.84
55004	53.68	51.97	24.41	28.08
6009	55.38	52.77	32.86	31.13
5516	48.62	45.24	31.26	27.46
427	133.98	122.12	25.76	25.36
6734	57.24	57.76	63.72	65
55967	35.6	38.09	53.45	50.28
1665	53.48	49.84	31.28	29.61
10186	77.91	73.94	24.88	26.2
1460	45.55	46.18	42.07	42.86
23129	36.12	35.94	29.76	30
10576	69.14	65.61	63.36	56.32
8087	47.41	50.8	37.15	37.22
4190	73.39	63.86	40.61	34.98
191	32.64	30.86	26.28	25.23
55194	28.88	28.01	20.09	22.47
54741	44.99	43.82	28.19	28.16
4724	41.77	38.2	32.89	33.17
5906	33.17	34.65	29.9	29.23
55651	45.89	45.3	33.98	35.62
10963	44.23	44.89	37.5	38.98
4696	38.98	43.77	34.75	35.84
3276	58.01	54.99	42.97	38.15
1537	44.91	43.18	29.38	31.09
7319	47.67	48.6	40.79	40.07
515	45.2	44.45	37.38	37.41
8615	37.31	35.81	41.37	41.62
10730	49.78	48.45	41.33	41.53
25890	73.93	77.36	32.24	32.17
9261	64.23	67.38	33.48	34.27
5358	179.21	160.55	60.26	60.27
9804	41.38	39.67	37.33	36.03
114990	42.42	43.63	35.33	36.65
124446	52.75	53.99	37.3	36.45
4925	80.46	80.61	69.33	80.35
6385	19.71	19.77	10.07	9.54
7037	65.48	60.34	27.65	26.43
11345	80.14	80.33	57.01	54.07
1893	134.18	133.12	65.75	66.7
253827	64.55	59.02	43.63	43.44
51421	51.41	54.94	24.83	25.55
163	50.52	51.1	48.14	47.11
389541	41.63	39.31	29.45	26.62
5691	58.46	50.05	43.4	41.26
11329	28.77	27.13	20.21	21.46
4723	35.55	32.52	29.98	29.26
5269	58.81	55.6	45.83	45.11
7106	59.85	64.65	24.24	27.95
348	6.35	4.59	0.13	0.14
6880	27	25.47	24.07	26.85
140823	44.38	42.79	33.01	31.3
117581	12.35	11.06	7.78	7.57
9921	35.72	35.94	27.22	27.17
83742	35.72	33.77	38.3	39.96
2260	55.51	56.62	54.17	49.64
128866	59.07	58.17	29.73	32.46
3895	71.09	73.77	37.52	39.04
10960	70.9	68.15	43.55	45.52
653513	10.27	8.88	7.1	6.34
51566	39.66	40.09	31.31	32.79
54998	50.26	50.7	37.16	36.44
3609	47.63	47.21	55.29	55.68
2821	62.44	57.82	49.36	48.94
11079	37.31	36.91	33.59	31.2
5831	16.18	12.94	114.3	109.88
4709	46.57	47.55	34.28	38.28
310	55.98	57.66	36.82	34.93
5917	39.52	36.85	41.73	40.97
23399	51.46	50.95	44.96	47.99
1611	120.28	116.89	88.86	81.3
27230	25.49	22.76	58.98	57.48
667	62.42	68.98	31.52	28.8
51398	65.4	59.01	41.69	37.31
522	52.41	49.57	34.92	37.19
54751	92.56	83.63	34.71	33.12
81539	50.33	49.8	46.24	43.7
121457	35.27	34.62	45.78	49
9637	25.16	24.78	14.83	14.93
10467	32.84	31.49	33.94	34.58
1843	103.2	101.36	18.06	16.31
1831	33.58	36.71	160.03	158.02
11261	35.46	36.73	28.82	27.41
10975	49.05	53.84	28.18	27.73
10397	47.12	50.6	35.38	35.67
83892	29.69	30.79	25.95	26.95
192286	48.61	46.49	32.69	30.23
10749	112.84	116.87	42.21	43.37
64710	49.71	48.8	62.87	65.1
1410	942.82	921.95	22.7	23.24
5480	30.82	25.67	67.31	66.88
1073	39.66	39.79	24.86	25.74
3614	17.78	15.21	29.43	29.95
11117	89.06	82.26	199.12	208.26
10121	54.14	54.53	42.87	45.67
27249	45.5	46.04	43.21	41.07
3608	54.36	56.88	58.92	64.48
9270	42.57	41.11	33.12	30.33
94	4.39	4.57	0.48	0.53
51507	51.68	55.48	39.23	42.89
51652	61.74	59.98	31.89	35.34
10890	51.98	50.93	36.94	37.25
5439	46.5	46.43	40.24	44.15
2817	131.51	129.37	32.24	34.51
22948	42.12	41.6	34.98	33.23
7756	50.06	43.49	39.97	39.22
5707	48.08	48.56	33.88	30.67
100131801	37.76	40.49	46.88	43.45
26585	0.87	0.73	18.87	19.06
23671	0.07	0.03	0	0
5713	36.98	35.08	40.56	39
116039	1.25	1.21	0.48	1.17
4739	5	4.35	4	3.41
51504	62.33	57.45	44.66	42.41
81671	40.51	42.47	42.74	41.39
8473	42.36	45.87	38.07	36.8
54940	63.61	66.55	38.22	37.9
25891	72.42	70.74	2.79	2.66
85027	13.57	13.64	10.77	11.33
51100	34.67	33.3	31.45	31.64
1635	47.23	47.19	38	36.98
79608	51.23	59.42	40.96	44.12
8804	80.02	77.73	16.83	17.56
7980	674.39	737.61	4.74	5.18
55860	46.38	45.53	32.96	31.27
6628	43.82	42.71	52.23	47.95
80727	29.53	29.15	56.65	59.03
2052	94.23	87.39	83.51	77.07
220988	40.49	43.94	59.37	65.17
7385	46.32	44.23	34.18	30.52
10456	53.03	49.01	35.41	37.7
9644	8.61	8.83	29.14	29.18
84886	77.91	78.4	40.94	45.65
6451	62.88	64.65	48.53	46.45
948	0.22	0.11	0.05	0.08
5531	40.22	42.27	34.97	35.45
2271	20.06	18.73	24.06	21.59
23196	44.17	41.05	44.34	43.32
26003	53.07	52.86	49.54	51.53
25870	50.89	53.01	50.17	48.52
10236	50.77	49.39	48.24	50.36
558	79.21	80.76	46.47	47.97
2181	33.44	30.66	49.55	48.08
114908	62.53	62.93	45.82	45.98
5683	44.44	43.64	44.99	43.67
11222	30.8	29.45	45.81	46.6
730	1.29	1.13	1.81	1.69
2314	49.57	48.44	30.12	28.95
9645	33.43	28.14	114.19	113.97
1545	51.23	54.97	61.12	61.22
56947	41.06	40.44	22.1	22.37
51604	66.68	67.09	43.01	40.52
81669	23.56	27.14	30.68	30.28
26135	35.14	35.39	40.93	43.71
10957	17.71	19.12	13.34	13.53
54532	116.29	121.91	1.85	1.75
4783	5.37	6.28	8.55	8.19
10988	40.01	41.81	33.16	34.02
5886	55.9	58.59	31.7	32.38
51107	50.26	55.29	41.52	42.22
11245	42.06	42.47	15.35	15.47
5936	38.02	42.76	35.48	37.46
84992	51.61	53.69	27.56	26.28
10644	2.85	3.06	3.12	3.19
9295	48.98	54.13	49.41	52.97
55714	0.66	0.59	0.59	0.64
347734	75.4	75.27	46.32	42.95
100188893	55.9	59.8	34.57	32.09
6637	42.91	47.04	42	43.56
9555	36.84	36.83	47.06	46.73
51335	84.36	86.69	47.18	38.19
1653	59.29	58.39	38.62	39.21
4720	39	39.4	31.46	31.93
23530	30.7	31.97	19.4	18.23
9782	55.41	56.79	45.2	44.87
57092	60.8	65.67	45.91	43.55
23326	54.52	57.15	48.14	46.94
1892	53.25	46.17	34.67	31.86
11282	75.79	70.52	22.29	20
4237	8.95	8.38	195.65	204.08
5894	41.02	43.14	29.3	27.23
50809	52.92	57.75	49.43	50.52
115098	39.96	41	40.29	41.08
5371	34.46	36.65	24.9	25.26
6603	17.32	18.06	26.67	24.57
3422	68.52	65.95	34.66	35.48
51234	51.87	53.45	40.59	38.1
7307	41.35	36.52	50.33	48.01
4154	63.85	67.42	43.38	43.14
1666	29.2	28.56	31.34	33.76
51253	36.22	29.17	29.15	29.26
22919	55.18	52.6	43.23	46.65
8896	30.24	25.96	34.99	38.07
112464	60.42	63.26	46.58	46.45
10632	47.52	48.74	35.74	35.46
1307	50.05	53.63	83.92	88
25828	36.34	37.59	30.45	30.96
9019	89.86	96.36	44.51	46.57
11343	59.43	56.86	5.13	5
7919	37.11	36.73	52.16	50.58
10430	75.82	65.56	33.14	29.5
7818	39.63	35.31	34.55	35.47
81552	54.73	53.09	34.02	32.85
113201	79.17	82.41	45.35	43.83
5585	62.94	59.01	16.08	15.16
7873	49.58	43.96	47.16	48.4
1781	43.49	43.15	34.98	35.94
2519	46.14	44.92	33.57	33.6
9444	33.31	35.15	32.08	35.15
11047	69.87	67.66	34.73	36.55
38	47.71	46.95	20.26	18.62
51639	42.64	41.84	46.11	46.52
2720	42.28	40.23	31.86	31.03
1783	62.85	61.27	51.22	49.41
10413	57.84	60.54	31.01	30.36
54918	58.35	61.35	33.45	33.03
51255	40.62	38.13	32.84	32.73
1209	61.13	64.55	34.16	35.21
5162	66	64.11	50.66	51.64
79036	43.4	43.99	31.58	33.25
81853	25.24	23.39	26.14	25.11
7358	60.8	60.78	28.77	27.7
8148	47.66	54.32	41.86	43.78
50814	31.21	29.26	15.77	16.53
3799	65.35	64.77	36.4	37.68
80332	27.86	33.36	25.52	27.97
348262	30.41	28.32	26.58	28.85
873	49.98	49.37	38.13	38.41
22826	63.69	59.34	36.29	36.97
117248	3.55	2.95	0.29	0.44
26099	42.86	45.11	33.79	31.97
402	132.56	132.55	49.76	58.02
6651	50.41	52.21	46.1	44.68
56951	41.58	41.86	40.29	40.92
1891	32.17	31.33	26.24	25.46
220323	41.44	47.39	5.87	6.13
23367	51.48	51.42	33.74	35.11
55829	45.78	43.69	53.61	51.5
147372	19.79	19.04	1	0.81
6780	46.99	47.35	33.67	33.68
10146	56.59	53.82	37.97	37.91
5048	43.44	42.16	35.21	34.68
9435	12.92	14.42	3.62	3.74
3098	161.36	158.31	70.06	64.8
8904	42.67	43.6	48.13	47.51
7041	59.35	49.55	50.11	51.74
830	59.99	64.16	31.12	31.53
27173	80.51	82.27	38.8	41.16
4256	303.61	274.54	69.18	63.3
64397	49.36	51.86	14.03	14.11
1808	66	69.72	44.37	44.89
6721	61.26	61.52	37.38	41.38
6881	47.2	42.89	26.89	29.79
79971	20.3	19.16	24.83	23.54
51643	38.34	40.13	24.48	25.6
51564	25.12	27.09	19.95	22.5
125058	8.49	7.8	8.4	8.66
10542	50.56	53.03	32.11	30.45
2287	35.39	33.18	34.66	41.7
83871	46.01	44.1	41.49	36.68
5434	37.03	40.56	24.15	26.27
84168	160.18	149.84	47.11	45.47
91252	37.9	36.45	43.71	41.69
6046	49.56	51.83	39.87	42.49
5447	12.49	13.81	10.2	8.67
10280	49.24	48.13	35.86	38.28
8570	44.87	44.03	37.7	39.22
22913	53.84	53.88	38.03	37.76
8837	27.82	30.06	13.72	13.12
9590	32.64	27.74	3.86	3.86
4350	31.3	27.92	28.96	25.08
5425	26.19	25	37.88	38.54
284207	20.08	17.85	12.14	11.93
2787	44.81	39.73	34.36	33.99
11230	65.7	62.65	71.55	74.86
11135	94.4	93.76	62.76	71.3
2647	29.99	26.01	30.96	31.04
80762	44.77	44.56	29.56	31.34
92154	30.08	31.34	11.11	12.5
54539	32.23	28.85	36.38	33.41
51699	42.4	42.15	35.24	32.98
23075	28.3	30.11	12.64	12.72
5756	57.64	58.44	39.89	38.2
80781	18.78	17.58	22.91	22.06
25796	32.84	28.24	31.49	31.31
6675	47.3	45.09	44.76	42.57
26017	42.31	46.76	26.85	29.67
11258	42.95	47.75	45.06	44.32
64236	43.93	38.72	38.43	37.27
9352	39.99	37.33	36.08	32.54
6773	52.08	56.72	28.4	29.15
586	4.82	4.9	37.81	37.59
5311	212.85	229.91	22.91	22.98
57045	72.61	72.71	36.35	35.58
26133	37.77	36.83	36.33	34.87
2673	39.86	41.79	33.21	33
10400	14	14.44	8.95	8.36
6605	40.63	44.68	34.83	39.01
664	25.16	24.24	20.54	20.41
1009	78.94	76.01	176.65	167.79
9158	33.21	26.19	30.51	31.64
9709	38.09	40.34	80.35	74.49
7386	40.16	40.46	33.18	28.81
103	59.12	58.4	36.07	35.05
9380	96.46	92.07	46	44.58
51304	25.63	25.57	16.11	16.5
80833	17.65	18.03	0.23	0.27
27316	50.03	48.11	50.58	46.99
30968	34.61	33.22	28.35	28.39
9552	42.03	48.38	30.45	35.4
10424	25.5	25.1	29.1	28.55
11333	39.62	43.97	40.76	43.44
11267	47.9	44.34	43.1	40.59
6391	44.99	41.73	26.01	27.31
5931	37.63	35.71	49.71	46.72
2664	62.74	63.56	40.45	39.83
54480	34.48	33.98	35.86	32.59
10598	46	42.05	31.41	30.52
51726	38.85	38.24	49.72	50.56
22980	39.8	40.46	40.89	42.8
9470	23.8	22.73	44.63	49.88
116254	40.61	45.79	24.01	23.01
3831	82.26	85.44	42.35	43.1
79109	38.16	34.04	28.33	25.74
51324	48.12	44.49	23.53	25.55
6400	37.03	36.9	23.44	24.8
10197	29.15	26.87	23.49	23.24
9553	37.11	40.02	33.47	31.02
25847	41.63	39.37	30.74	32.82
92579	47.11	50.78	34.21	40.33
1822	70.6	82.18	44.52	51.96
10016	36.34	35.44	24.99	27.37
79987	4.26	3.97	2.78	2.73
60559	32.67	30.84	24.37	24.85
50813	38.54	37.95	28.43	32.05
1717	92.37	90.35	52.51	53.43
284361	79.15	85.42	37.02	36.65
537	63.47	61.87	40.57	41.52
2194	96.15	93.53	55.91	55.7
90522	42.21	42.39	53.54	55.34
10241	21.51	21.35	19.08	19.51
4883	5.96	5.72	15.17	13.5
1155	49.24	47.95	40.77	40.39
51520	30.55	29.72	31.95	31.96
5793	8.11	9.14	13.85	13.89
64116	16.98	16.85	3.27	2.74
64943	39.86	32.46	127.7	120.11
3654	91.35	87.36	29	29.85
7917	61.86	67.22	37.74	40.19
1805	185.53	213.67	257.83	234.9
51280	32.92	32.85	24.29	23.47
158471	35.62	28.95	16	16.71
3184	48.77	47.96	59.93	61.8
2107	46.27	44.94	30.36	30.29
55625	40.6	40.87	14	14.83
6884	52.54	51.76	44.52	40.52
2615	19.63	15.86	0.73	0.62
10531	55.64	54.2	25.39	24.81
4430	20.61	20.97	34.28	35.6
9411	21.35	21.22	13.28	13.06
10914	34.12	32.97	30.01	27.49
51114	15.78	16.11	18.03	18.88
4947	51.48	54.52	28.4	29.9
8872	48.29	46.61	34.31	30.19
55742	42.22	38.76	29.68	29.6
8260	29.96	31.89	28.33	28.24
5595	51.26	50.6	22.91	22.86
9524	68.83	70.43	50.72	54.14
26354	20.53	23.42	34.6	36.24
100287932	42.21	42.33	37.91	32.68
23136	12.7	12.23	8.15	9.06
7027	48.99	50.25	33.31	33.96
392	40.54	38.7	32.98	33.62
4711	41.79	41.85	33.19	31.75
79586	77.74	78.09	42.88	41.87
9659	36.09	39.19	16.68	14.33
3308	66.61	66.9	29.88	30.2
1500	37.17	36.26	40.97	41.31
83443	33.43	29.03	40.57	37.01
4150	63.05	60.27	86.05	91.68
51075	59.24	59.41	36.27	35.66
55643	24.4	22.78	21.86	22.25
55017	25.44	23.88	25.1	23.65
4697	72.07	69.63	43.28	38.12
10477	41.67	40.7	39.31	39.37
10558	31.37	32.03	33.06	31.8
51330	163.23	175.32	79.79	79.59
10155	43.71	42.13	41.79	41.49
5566	48.66	49.94	47.33	49.87
5168	0.6	0.54	10.01	8.28
10440	53.77	51.45	38.34	36.25
204	41.03	38.74	33.32	31.78
10015	37.96	39.42	24.6	25.87
10512	189.34	201.32	49.68	48.46
1398	32.81	32.33	28.03	26.75
149603	43.75	44.05	36.69	38.67
84293	67.53	75.78	12.56	12.13
3337	30.92	32.47	24.21	24.23
10067	77.65	74.23	34.18	38.34
51082	25.35	26.39	29.48	26.7
11142	41.51	40.84	9.46	10.09
9775	35.23	30.06	26.72	23.87
51406	44.18	41.51	30.07	35.19
27183	35.86	36.79	25.66	24.56
3065	35.04	34.79	23.62	24.45
57493	199.8	205.92	35.35	33.45
10213	34	31.29	24.99	25.87
11344	16.64	18.35	25.85	24.16
25941	48.66	47.68	32.22	33.55
8985	31.84	29.6	30.6	31.41
133619	24.1	21.83	40.04	41.43
5524	51.19	53	40.12	39.92
1649	15.19	21.33	13.56	11.91
5621	115.19	118.83	47.13	45.99
100	2.45	1.84	1.72	1.28
1316	41.8	38.29	35.25	35.09
23435	34.67	32.96	36.22	36.18
51752	17.75	18.58	5.64	5.7
10616	41.39	42.91	26.18	27.97
10594	39.38	38.2	37.55	34.45
10949	40.42	41.46	41.48	43.92
150678	32.31	27.04	38.64	29.2
1827	187.03	196.61	10.64	10.55
85012	39.62	44.55	26.01	31.1
323	23.43	22.24	27.1	25.14
6427	38.34	40.3	51.1	50.22
54187	23.77	19.65	33.26	32.7
1487	41.2	41.64	38.99	38.79
221092	40.25	44.33	35.58	38.77
388	30.97	29.3	41.87	42.02
54039	2.43	1.87	0.35	0.3
4053	175.01	184.31	201.53	201.14
55830	25.5	25.68	35.16	34.83
55207	37.19	38.01	17.25	16.56
3275	49.38	49.35	35.42	37.41
51646	54.15	56.81	25.96	23.18
170954	69.12	70.31	33.36	37.96
23190	39.57	42.57	34.56	33.79
2483	27.32	29.43	23.73	24.44
11072	26.34	25.17	16.86	14.13
81618	96.91	102.11	59.96	57.74
4809	40.69	39.16	27.75	28.81
5899	24	23.33	33.59	35.61
10539	29.64	27.78	25.5	25.98
8720	45.79	44	35.5	31.07
9978	35.45	33.49	37.89	35.68
5937	24.71	26.5	21.42	22.77
5238	24.71	23.08	42.25	40.01
3281	46.7	46.87	27.38	30.56
5719	38.45	36.58	35.73	34.23
100529097	37.42	42.34	31	33.03
9520	50.64	52.3	18.06	17.45
10554	43.85	42.84	32.85	34.87
678	48.41	48.84	47.53	45.65
9685	33.38	38.32	37.87	38.11
10954	17.69	16.54	27.62	29.17
6731	32.01	32.34	35.71	35.37
6892	77.92	82.73	23.53	22.09
6879	22.75	20.65	23.1	24.47
7324	41.26	42.81	29.22	27.51
3146	42.79	44.8	54.77	58.08
54510	10.64	11.84	9.03	7.79
5036	36.72	34.71	34.23	36.64
50486	19.46	19.81	7.92	7.49
7916	51.72	55.67	41.79	43.5
9208	68.7	68.56	30	30.88
23576	99.36	97.19	31.93	33.64
5701	44.77	40	35.58	32.69
9531	30.52	25.7	30.97	33.39
83939	24.3	23.48	29.3	29.81
25940	37.86	36.54	46.76	46.97
10605	49.8	53.05	23.4	24.86
1267	48.8	47.12	25.48	25.48
9265	38.18	40.52	24.61	23
27248	37.14	38.56	35.05	33.67
387521	15.38	15.31	15.58	17.6
6786	12.13	12.68	7.45	7.98
10273	40.14	43.03	25.95	25.01
25907	13.12	12.96	6.09	5.22
7266	30.59	32.59	24.05	25.12
1889	103.63	104.88	19.33	18.94
52	34.27	31.11	35.2	34.19
23392	26.66	26.3	21.21	21.2
10527	36.31	38.55	37.91	36.84
84818	8.46	9.03	8.77	8.44
80854	40.22	41.26	22.11	20.66
8795	38.9	44.16	14.37	15.03
55323	97.39	108.55	34.51	34.22
25793	65.02	65.32	34.63	34.4
2317	16.02	14.59	8.58	8.99
9908	54.22	55.22	35.55	35.51
83604	358.29	394.04	23.74	22.71
51014	44.81	42.4	43.38	41.97
1200	81.37	70.42	23.79	25.01
58190	34.36	34.78	38.83	39.95
57003	40.17	43.33	37.76	38.01
9877	41	42.23	38.3	38.08
51433	40.41	37.29	43.54	39.32
2067	27.4	27.69	25.69	22.17
7533	120.22	103.43	56.51	57.84
51124	22.03	21.7	31.89	31.51
490	22.34	24.14	8.55	8.83
27063	38.62	38.19	6.11	6.37
23256	31.83	32.13	31.86	32.26
968	75.34	84.29	13.89	15.37
9612	23.2	23.19	37.95	41.46
518	32.27	31.84	29.55	30.51
185	1.44	1.07	0.24	0.12
1652	33.79	35.63	23.56	23.34
84324	37.95	37.38	41.1	41.45
26071	23.69	26.45	25.45	23.51
84232	38.15	38.47	34.22	32.62
51300	39.91	41.14	26.85	25.22
9861	38.76	36.17	31.2	30.11
5832	21.24	18.05	48.47	44.94
11338	47.07	49.67	31.77	33.83
25792	57.44	59.34	28.13	29.82
22883	51.41	50.97	38.74	38.5
6390	36.13	36.03	25.4	24.24
5295	9.69	10.06	8.53	8.36
84935	48.14	53.64	0.85	0.92
80301	21.56	19.84	9.47	8.3
59342	71.1	70.02	37.08	32.22
5098	74.9	75.01	49.92	55.22
5515	38.95	40.84	33.36	33.67
54460	33.69	36.75	28.94	28.19
23788	36.31	34.41	21.82	22.89
55827	28.01	27.6	21.86	20.88
9181	19.91	22.79	17.09	16.2
200916	15.74	14.47	21.89	20.6
57175	41.14	37.83	23.75	25
1453	32.3	32.42	24.54	24.66
8801	24.29	20.73	22.68	23.5
81555	31.17	28.58	39.62	40.06
8910	46.62	51.24	27.55	23.51
4780	89.97	95.42	36.09	36.17
7991	25.26	22.02	17.98	16.58
84231	28.58	30.55	26.09	25.64
203	51.48	54.17	26.76	26.96
7803	73.21	80.06	32.02	31.69
8450	28.34	25.87	16.21	15.36
65018	43.81	41.42	19.67	20.88
4609	15.78	15.67	27.3	25.56
55862	39.21	38.45	27.7	27.59
6646	29.15	30.95	11.22	11.41
151011	49.75	48.75	23.66	26.38
3336	47.29	44.58	32.01	36.94
9780	51.41	53.62	22.3	22.28
6251	52.19	50.56	38.43	40.77
54935	8.64	8.97	38.78	43.75
5709	33.98	34.69	32.09	32.9
23479	43.99	48.45	23.02	24.79
7280	20.51	14.72	33.79	34.4
10488	52.32	49.06	37.82	40.25
64747	55.21	53.54	24.74	23.62
7390	38.81	39.1	26.58	26.66
1368	1.04	1.16	1.25	1.1
7026	15.2	17	4.41	5
3838	54.67	54.42	42.2	47.37
284	5.8	6.29	33.27	30.68
51569	28.18	29.4	29.35	28.49
25959	56.11	53.29	26.17	26.33
29940	32.6	32.56	56.1	51.7
55069	46.99	48.47	29.55	30.48
51129	1.05	0.96	1.27	1.08
5202	42.01	47.09	29.06	33.26
29979	39.41	39.79	25.37	25.05
51493	33.26	35.21	31.66	32.04
112495	46.6	45.85	29.76	32.55
51279	16.32	19.99	15.45	16.04
10284	39.09	42.41	25.01	23.51
1107	34.65	40.85	38.83	38.85
57488	37.72	38.53	22.14	20.86
55707	30.96	29.38	18.61	18.28
7003	35.41	35.31	36.52	36.32
63874	25.99	27.44	13.99	13.12
7336	27.49	27.71	29.79	30.67
51747	32.06	36.28	32.56	35.12
4597	50.81	50.37	35.6	36.82
27350	22.31	21.57	13.06	14.71
51629	47.69	46.02	27.43	26.53
25874	32.52	32.77	22.59	21.03
23032	17.32	18.31	12.73	13.28
9540	19.35	19.87	27.17	29.09
5571	30.93	30.58	29.01	28.94
7538	12.82	14.18	11.22	11.31
28971	34.93	33.21	21.25	22.13
1051	10.33	12.08	9.55	11.33
7353	33.41	31.79	24.39	23.02
10299	33.54	37.33	30.56	30.55
162394	29.72	28.83	17.82	16.92
8672	42.09	43.16	23.83	26.24
283149	17.99	19.37	18.23	18.73
5436	31.78	30.96	45.91	45.59
5127	35.77	36.39	26.43	25.85
3550	44.27	45.65	31.87	33.92
7322	29.37	32	25.85	28.34
10657	26.71	26.52	35.59	36.03
8887	41.05	40.11	22.31	22.93
23275	29.33	25.41	34.23	34.12
285148	37.19	33.77	30.28	26.65
112770	89.11	82.86	29.24	26.65
10455	23.51	23.8	19.2	17.92
1108	40.42	39.45	41.55	43.01
27032	48.52	47.53	29.77	28.24
1743	40.57	40.73	31.14	30.4
3223	0.03	0.03	0.03	0
10989	27.32	25.79	28.23	27.07
9577	17.56	18.95	11.23	9.68
22916	33.5	37.28	26.8	27.01
55052	40.64	38.68	37.09	32.15
79590	24.36	23.07	24.6	25.84
1958	39.92	34.41	11.64	10.83
10944	34.6	38.31	31.78	30.45
50807	20.5	22.55	16.73	17.01
55699	44.34	42.03	24.08	22.41
57179	76.16	76.91	31.22	30.34
26073	42.63	40.73	27.5	28.6
9652	30.69	30	27.14	25.71
26022	37.73	35.93	32.15	30.16
114823	13.61	17.41	28.6	31.55
23264	35.17	37.16	21.55	21.64
9703	64.62	62.76	29.22	27.43
2926	47.96	46.36	30.46	33.14
550	29.41	29.83	29.57	30.58
6431	28.01	30.45	28.32	29.25
10904	23.1	22.91	15.77	16.51
27258	37.89	40.41	31.08	32.38
8881	35.76	36.87	25.36	26.34
3482	31.12	29.16	18.51	17.67
10066	36.32	37.17	19.89	20.14
4077	43.86	51.54	27.56	26.53
9945	11.72	10.34	14.87	14.22
439	54.55	54.9	28.72	28.17
4199	48.8	53.07	19.29	18.76
57038	14.56	14.37	19.52	19.86
51389	34.15	33.8	29.66	28.26
9322	41.83	43.39	29.22	29.4
51422	13.19	12.67	2.32	2.36
83692	31.73	30.62	24.51	25.78
5786	21.94	21.36	16.32	15.96
81565	31.21	33.8	34.02	34.52
11030	43.18	42.11	7.55	11.02
387758	2.96	2.63	13.33	12.55
51622	52.8	55.6	26.33	27.19
6856	51.43	53.93	29.93	30.11
5510	40.79	38.01	24.21	24.82
56984	31.91	33.65	27.2	26.67
2734	27.83	27.36	37.02	35.49
107985911	25.34	23.69	12.25	13.47
90480	37.15	38.78	24.66	31.94
201895	48.9	54.86	15.63	15.03
2872	4.18	4.23	7.49	7.35
6051	25.81	23.58	20.22	20.49
7514	52.36	52.95	33.41	33.04
79587	28.86	26.97	14.56	12.2
10269	38.22	38.51	36.6	36.84
27347	23.45	24.57	11.56	12.79
51126	35.58	36.44	35.2	33.37
11325	32.05	35.79	31.08	31.91
2149	66	64.6	16.6	15.35
22827	35.26	33.73	30.92	30.81
90410	9.22	9.88	25.28	23.47
57048	29.56	31.59	27.61	31.55
217	26.13	24.41	14.86	14.8
5500	34.74	35.17	75.29	70.96
8704	57.84	54.42	57.48	60.33
285855	35.43	35.37	28.21	27.44
7035	35.98	40.34	4.23	4.54
79004	36.77	38.33	29.33	25.87
391	23.28	20.62	17.09	17.44
23118	29.49	32.92	30.04	28.34
116138	19.17	19.98	35.04	33.72
51109	41.33	42.25	46.87	44.93
57153	132.75	140.99	41.42	44.3
29085	31.47	28.41	26.1	24.33
130074	32.77	32.6	28.77	28.57
64975	25.7	22.44	26.11	25.56
6453	23.98	24.39	16.33	18.33
7162	30.63	38.28	18.7	19.31
222658	23.58	21.36	16.51	15.43
9653	17.28	18.34	8.34	8.75
57410	37.92	38.92	30.69	31.78
56975	14.35	12.52	18.47	17.55
1983	30.13	30.43	28.07	28.24
23673	26.65	26.84	13.09	13.93
9244	52.13	51.91	83.43	82.91
5885	49.31	50.83	41.47	40.88
89796	17.45	16.7	29.22	29.12
23543	27.18	27.5	30.92	30.77
6631	31.99	30.04	32.01	32.28
7905	37.44	38.31	24.7	23
3371	129.44	128.06	124.76	110.6
7392	54.3	58.16	30.79	29.61
7095	34.64	36.41	28.23	29.66
7419	48.95	44.7	33.45	29.56
54431	40.58	36.67	32.14	30.13
4201	63.83	63.92	34.35	33.31
55684	37.69	39.34	25.74	28.02
55737	39.27	39.29	27.54	27.26
102	73.05	75.16	66.93	65.31
23061	47.62	48.58	23.89	23.09
57018	18.97	18.18	16.02	15.15
23111	26.85	25.89	17.08	15.67
2971	37.55	35.54	27.13	28.3
6840	33.28	34.63	24.13	22.32
2764	29.17	29.36	21.21	22.35
390	87.29	94.35	17.59	15.82
100287171	40.12	46.64	27.2	28.98
51094	61.5	64.08	32.22	29.93
10105	8.57	8.53	11.47	12.55
91947	6.05	5.69	6.92	6.16
23344	80.88	72.29	22.1	21.35
85236	72.91	80.49	15.1	12.1
5737	6.3	6.38	13.7	12.55
8812	21.62	21.74	24.21	27.06
26528	31.98	30.93	32.58	31.44
2824	6.01	6.76	7.15	6.29
2054	18.27	18.15	19.75	20.21
25829	100.44	114.6	31.25	31.09
9209	39.11	41.32	22.95	24.81
1362	20.52	19.46	15.59	15.09
23564	67.07	67.18	36.06	39.88
471	32.64	35.22	21.97	22.33
2051	5.42	5.25	1.49	1.82
23710	38.8	41.96	21.42	22.12
5869	39.82	39.63	19.8	21.75
84545	32.57	33.88	28.19	26.95
23641	16.43	18.49	17.04	19.09
57658	32.53	40.27	19.86	20.95
63905	31.14	33.26	23.72	23.63
28988	44.59	41.01	32.2	34.36
112483	30.68	32.64	18.85	16.62
9230	35.46	36.3	26.43	27.07
6594	45.05	44.76	32	32.4
1956	7.36	7.5	3.79	3.48
1457	34.91	36.01	26.66	27.68
51322	31.71	31.91	29.66	27.3
10163	27.21	26.69	25.85	25.98
837	34.46	33.32	12.99	13.27
53838	28.45	24.64	37.26	40.22
26012	31.29	30.36	22.71	22.74
5430	30.52	33.08	19.44	19.52
26118	40.72	45.3	41.36	41.87
7389	43.64	41.85	25.77	24.21
8802	27.91	25.48	23.82	19.54
9950	33.23	33.45	29.43	29.58
337867	46.02	42.4	18.63	18.25
10573	31.8	36.17	22.75	25.12
5310	47.82	53.03	39.32	39.73
25976	6.3	6.84	10.24	10.42
513	29.62	26.73	25.05	22.33
6272	36.33	33.91	15.38	15
2339	21.03	19.88	23.32	20.25
9236	54.02	53.55	38.68	38.41
404636	42.65	39.65	12.26	11.31
26001	45.21	47.93	17.74	19.02
11078	48.71	49.91	9.89	9.87
10428	21.91	21.13	23.07	26.53
81892	28.66	26.59	28.82	24.48
4133	7.69	7.54	2	2.23
54495	29.52	33.4	20.85	21.21
10075	45.25	49.93	29.88	29.3
3163	31.71	34.73	19.7	21.02
84695	15.11	14.79	58.54	58.76
1052	20.42	22.43	21.2	23.6
2885	33.14	33.83	24.18	25.29
91942	12.08	14.3	19.76	20.44
8555	6.65	7.86	7.79	7.97
2791	85.81	95.72	27.31	26.25
9550	51.58	53.89	32.25	34.9
9761	56.41	56.68	43	45.04
8545	25.78	27.93	28.48	26.73
57062	64.82	66.64	31.94	32.05
3189	52.97	62.53	44.65	47.18
8519	146.18	171.79	50.83	47.85
2534	45.88	44.06	18.49	17.15
23167	29.42	29.17	16.37	15.29
4702	35.05	35.11	21.73	20.12
109	8.8	8.26	3.71	3.78
4782	28.56	29.48	33.04	31.87
2286	45.78	52.48	33.96	36.38
9526	22.36	24.95	18.03	17.35
6428	37.46	32.41	40.39	40.65
9669	36.69	36.59	24.62	25.66
22803	27.35	29.51	23.7	21.58
196527	73.79	72.67	23.39	22.46
22839	36.2	35.2	23.17	23.32
55255	29.76	32.88	22.83	21.8
53635	32.02	29.79	27.21	27.64
80255	20.12	19.79	18.66	18.75
10289	26.46	26.89	20.83	21.27
140467	40.19	42.51	22.94	25.44
2309	13.55	12.52	15.93	16.08
5627	58.06	55.25	5.66	5.65
10489	32.87	32.24	29.27	27.98
10010	33.42	35.74	15.46	15.21
23463	59.79	58.3	28.97	28.23
8943	36.43	34.24	29.56	29.33
8428	21.34	23.02	21.86	21.22
6443	65.91	68.65	31.08	29.29
6432	40.15	39.17	44.11	44.59
2629	118.23	118.01	27.95	28.37
79834	21.93	21.85	24.96	25.16
55233	25.18	25.97	22.69	23.31
1207	29.78	28.93	26.77	26.77
5130	30.75	28.79	20.85	19.84
10181	29.84	32.53	29.54	29.77
2004	28.17	31.53	18.01	18.02
26994	60.43	62.85	29.64	28.04
10606	31.15	30.75	28.94	29.3
8813	23.05	24.86	25.41	23.77
64746	24.99	24.62	29.86	31.62
113419	39.6	38.76	27.1	28.86
[truncated: 16,837 more rows]
